# Supplementary material
Source: Copernicus journal article supplement (doi:10.5194/egusphere-2026-3444)
Supplement: Supplementary file 1 [file egusphere-2026-3444-supplement.pdf]

## **Supplementary Material**

For

### **Linking the effects of environmental factors and heterotrophic bacteria to the variability of carbon isotope ( $\delta^{13}\text{C}$ ) across crustacean zooplankton in shallow freshwater ecosystems**

authored by

**Wojciech Krztoń<sup>1</sup>, Edward Walusiak<sup>1</sup>, Iwona Gołaś<sup>2</sup>, Elżbieta Wilk-Woźniak<sup>1</sup>**

<sup>1</sup>Institute of Nature Conservation Polish Academy of Sciences, al. Adama Mickiewicza 33, 31-120 Kraków, Poland

<sup>2</sup>Department of Water Protection Engineering and Environmental Microbiology, Institute of Engineering and Environmental Protection, Faculty of Geoengineering, University of Warmia and Mazury in Olsztyn, ul. Prawocheńskiego 1, 10-720 Olsztyn, Poland

#### **Corresponding author:**

Dr. Wojciech Krztoń

Email: [krzton@iop.krakow.pl](mailto:krzton@iop.krakow.pl)

ORCID: 0000 – 0003 – 2224 – 2599

**Table S1.** One-way Analysis of Variance (ANOVA) of  $\delta^{13}\text{C}$  values in studied groups of planktonic crustaceans

|           | Df  | Sum of Squares | Mean Square | F value | Pr(>F) |
|-----------|-----|----------------|-------------|---------|--------|
| group     | 2   | 39             | 19.50       | 1.081   | 0.342  |
| Residuals | 121 | 2182           | 18.03       |         |        |

**Table S2.** Tukey HSD test for  $\delta^{13}\text{C}$  vs. groups ANOVA

| Group                | Difference | Confidence Interval |          | Adjusted p-value |
|----------------------|------------|---------------------|----------|------------------|
|                      |            | Lower               | Upper    |                  |
| cyclopoida-calanoida | 1.2673441  | -0.7790798          | 3.313768 | 0.3091662        |
| daphnia-calanoida    | 0.5897779  | -1.8343555          | 3.013911 | 0.8324815        |
| daphnia-cyclopoida   | -0.6775662 | -3.0927782          | 1.737646 | 0.7838003        |
